# Supplementary material
Source: Springer Nature journal article supplement (https://www.springermedizin.de/resource/supplementary/13014_2012_661_MOESM5_ESM.pdf/9633912)

A

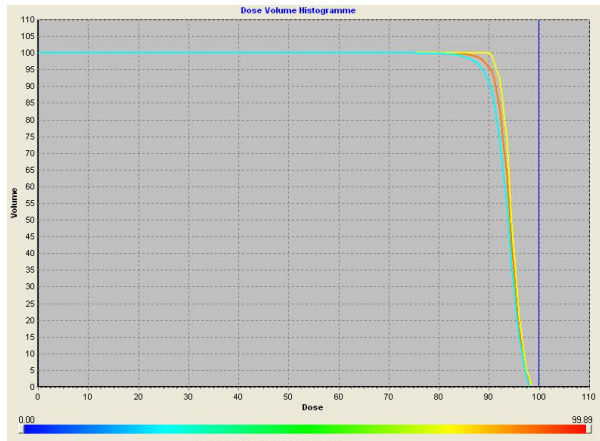

B

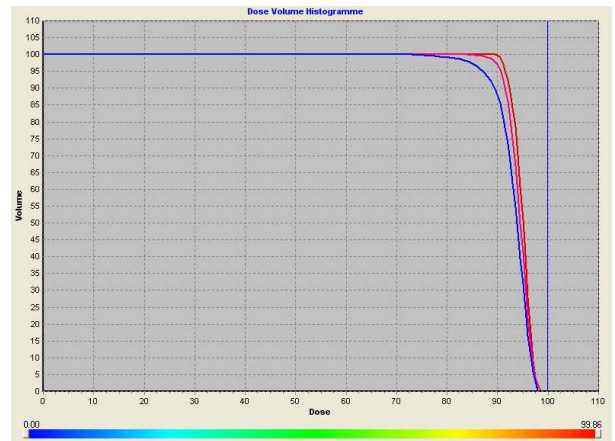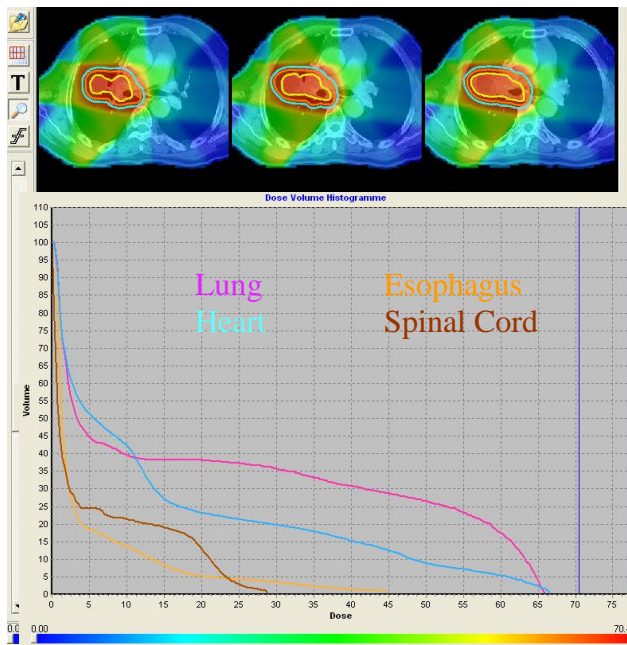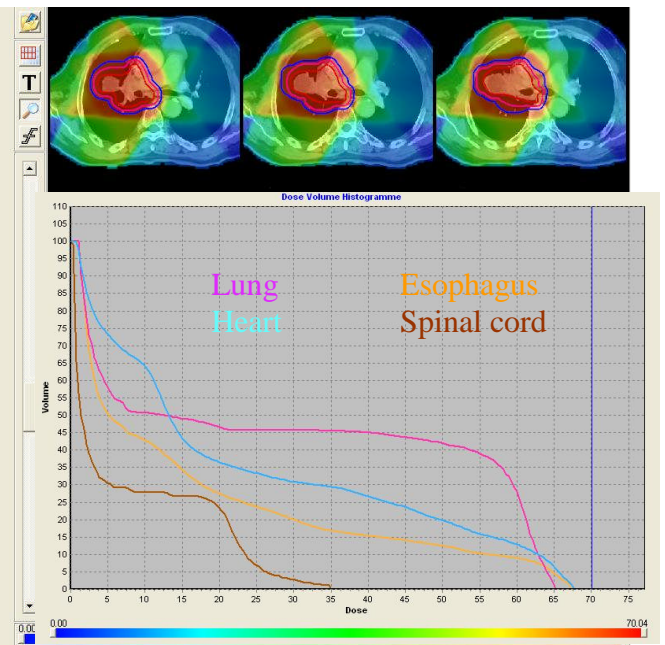

Supplement: MOESM5 [file 9633912]
